# Supplementary material
Source: HighWire-hosted journal article supplement (https://cmaj.ca/highwire/filestream/148520/field_highwire_adjunct_files/4/220717-res-5-at.pdf)
Supplement: 220717-res-5-at.pdf [file 220717-res-5-at.pdf]

## **Appendix 5 (as supplied by authors): Treatment Considerations**

### ***NIHB Claimants***

ICES databases do not capture NIHB or federally-funded healthcare services. Lack of NIHB prescription claims constitutes a significant limitation to capturing HCV treatment records among First Nations individuals in Ontario. However, the NIHB program is the payer of last resort after other provincial or third-party coverage is exhausted.<sup>1</sup> Therefore, if an individual is covered by another public or private health care plan, they are required to submit their claims to the other plans first.<sup>1</sup> For information about individuals who may have only had NIHB coverage during the study period and thus did not have their prescription claims recorded in the administrative datasets, through the *Access to Information and Privacy Act*, we examined aggregate data regarding the number of NIHB claims and claimants for HCV medications from 1999 to 2016 (unpublished). From these data, we observed that even at the highest number of claimants per year (~59 in 2016), our findings would not be substantially impacted as a large gap would remain between the genotyped and treated stages. In addition, because the aggregate data captured individual claimants each year, we estimate that the number of individuals with their first treatment dispensation record would be considerably lower.

### ***Changes in Treatments and Eligibility Criteria***

Many of the eligibility restrictions for the public funding of direct acting antiviral treatments for HCV were lifted in 2017 in Ontario.<sup>2</sup> One of the most common eligibility criteria for treatment, significant liver fibrosis, was lifted in March 2017 in Ontario.<sup>3</sup> Despite the introduction of pangenotypic treatment regimens in 2018, crude analyses of prescribing trends demonstrated relative consistency after 2017. Using our treatment DIN definitions from Appendix 2 Table S2, we examined the annual number of unique individuals with record of first HCV treatment dispensation in Ontario (N=30,165), as well as among all individuals who identified as Status First Nations (N=810). The largest increases were observed at 2015 and 2017 with year to year changes thereafter being minimal. Substantial declines were

observed in 2020, likely due to the effects of public health measures in response to the COVID-19 pandemic which limited the progress made in expanding access to HCV care and treatment. We used data up until 2018 to be consistent with the availability of PHO HCV testing data and examined post-treatment SVR and reinfection based on RNA testing trends.

**Table S9. Crude annual number of unique individuals with their first HCV treatment dispensation record in ODB each year from earliest date available (1997) to 2020.**

| Year | All individuals at earliest HCV treatment dispensation | Status First Nations Individuals at earliest HCV treatment dispensation |
|------|--------------------------------------------------------|-------------------------------------------------------------------------|
| 1997 | 19                                                     | 0                                                                       |
| 1998 | 66                                                     | 0                                                                       |
| 1999 | 283                                                    | <=5                                                                     |
| 2000 | 238                                                    | <=5                                                                     |
| 2001 | 230                                                    | <=5                                                                     |
| 2002 | 188                                                    | <=5                                                                     |
| 2003 | 566                                                    | <=5                                                                     |
| 2004 | 834                                                    | <=5                                                                     |
| 2005 | 859                                                    | <=5                                                                     |
| 2006 | 780                                                    | 11                                                                      |
| 2007 | 977                                                    | 7                                                                       |
| 2008 | 877                                                    | <=5                                                                     |
| 2009 | 1011                                                   | 8                                                                       |
| 2010 | 862                                                    | 12                                                                      |
| 2011 | 831                                                    | 8                                                                       |
| 2012 | 687                                                    | 15                                                                      |
| 2013 | 768                                                    | 8                                                                       |
| 2014 | 422                                                    | 15                                                                      |
| 2015 | 2016                                                   | 34                                                                      |
| 2016 | 2688                                                   | 74                                                                      |
| 2017 | 4702                                                   | 165                                                                     |
| 2018 | 4679                                                   | 155                                                                     |
| 2019 | 3703                                                   | 165                                                                     |
| 2020 | 1879                                                   | 114                                                                     |

\* Cell sizes <=5 cannot be reported or able to be recalculated to comply with ICES privacy rules.

## *References*

1. First Nations and Inuit Health Branch: Non-Insured Health Benefits Program: Annual Report 2017-2018 [Internet]. Indigenous Services Canada; 2021 Nov. Available from: <https://www.sac-isc.gc.ca/eng/1581294869253/1581294905909>
2. Tadrous M, Mason K, Dodd Z, Guyton M, Powis J, McCormack D, et al. Prescribing trends in direct-acting antivirals for the treatment of hepatitis C in Ontario, Canada. *Canadian Liver Journal*. 2021 Feb;4(1):51–8.
3. Saeed S, Strumpf E, Moodie EEM, Wong L, Cox J, Walmsley S, et al. Eliminating Structural Barriers: The Impact of Unrestricted Access on Hepatitis C Treatment Uptake Among People Living With Human Immunodeficiency Virus. *Clinical Infectious Diseases*. 2020 Jul 11;71(2):363–71.
